# Supplementary material for: 2D titanium carbide (MXene) for wireless communication
Source: PubMed Central journal article supplement — Sci Adv. 2018 Sep 21;4(9):eaau0920. doi: 10.1126/sciadv.aau0920 (PMC6155117; doi:10.1126/sciadv.aau0920), 2018-09-21
Supplement: aau0920_SM.pdf [file aau0920_SM.pdf]

## Supplementary Materials for

### 2D titanium carbide (MXene) for wireless communication

Asia Sarycheva, Alessia Polemi, Yuqiao Liu, Kapil Dandekar, Babak Anasori\*, Yury Gogotsi\*

\*Corresponding author. Email: ba323@drexel.edu (B.A.); gogotsi@drexel.edu (Y.G.)

Published 21 September 2018, *Sci. Adv.* **4**, eaau0920 (2018)

DOI: 10.1126/sciadv.aau0920

#### This PDF file includes:

Ti<sub>3</sub>C<sub>2</sub> spraying on paper substrates

Skin depth

Fig. S1. Photo of thick MXene film sprayed on PET, label paper, and printing paper.

Fig. S2. AFM image of PET.

Fig. S3. SEM image of a MXene Ti<sub>3</sub>C<sub>2</sub> antenna cross section.

Fig. S4. Reflection coefficient of Ti<sub>3</sub>C<sub>2</sub> MXene.

Fig. S5. Comparison of the return loss of MXene dipole antenna with metals, carbon nanomaterials, conductive polymers, and transparent conductive oxides.

Fig. S6. Characteristics of dipole antennas made of Mo<sub>2</sub>TiC<sub>2</sub>, Ti<sub>2</sub>C MXenes, and metal foils.

Fig. S7. Normalized radiation pattern of Ti<sub>3</sub>C<sub>2</sub> MXene sprayed film antennas.

Fig. S8. Characteristics of transmission lines made of MXene Ti<sub>3</sub>C<sub>2</sub> and metal foils.

Fig. S9. Dimensions of RFID antennas made of Ti<sub>3</sub>C<sub>2</sub> MXene.

Table S1. Sheet resistance of Ti<sub>3</sub>C<sub>2</sub> MXene sprayed on paper.

Table S2. Comparison of the return loss of MXene dipole antennas with other materials.

References (34–44)

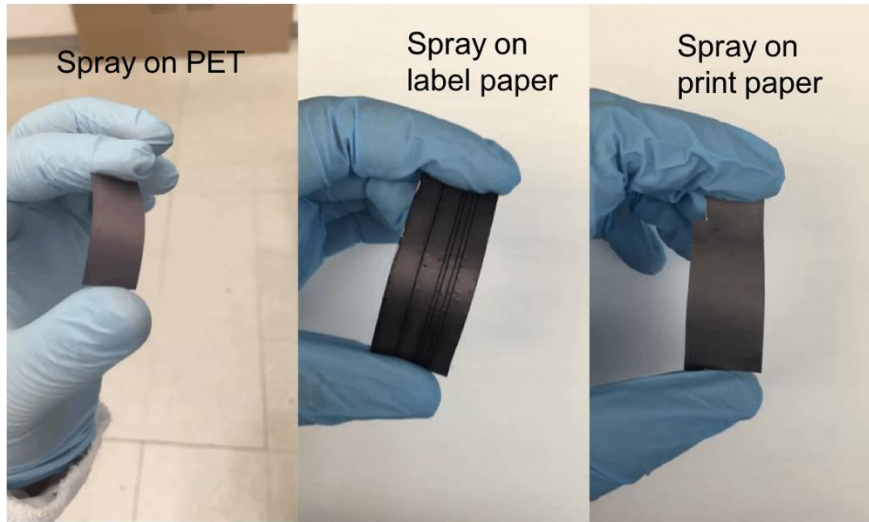

**Fig. S1. Photo of thick MXene film sprayed on PET, label paper, and printing paper.**

### **Ti<sub>3</sub>C<sub>2</sub> spraying on paper substrates**

To show the variety substrates that can be potentially used, we sprayed MXene on various paper types pre-cut by laser: “*resume*” (Southworth 100% Cotton Resume Paper, 8.5" x 11", 32 lb., Wove Finish, White), “*printing*” (Boice X9 20 lb./75 gsm/10M), “*thesis*” (Southworth Thesis Paper, 8.5" x 11", Wove Finish, Bright White), and “*label*” paper (Avery 8160). Spraying was complicated due to wetting and deforming of the paper during the spraying process. Several samples were prepared: paper substrates were cut in rectangular shapes of 5 by 5 cm<sup>2</sup> which were cut after spraying process into TLs and antennas. In order to keep the same conditions, spraying was done at the same time for all the substrates. In Table S1, data on sheet resistance obtained from various papers are presented.

**Table S1. Sheet resistance of Ti<sub>3</sub>C<sub>2</sub> MXene sprayed on paper.**

| <b>Paper type</b> | <b>Sheet resistance (Ohm/sq)</b> |
|-------------------|----------------------------------|
| Print             | 11 ± 6                           |
| Resume            | 7 ± 1                            |
| Thesis            | 47 ± 14                          |
| Label paper       | 1.1 ± 0.2                        |

The lowest resistance was reached by using the “label” paper. However, label paper shows several wrinkles and lifted-off regions (Fig. S1), which can disrupt the conductive pathway. Determining the thickness for those samples was complicated due to the wetting and penetration of MXene through porous paper. However, in future, paper may be used as a cheap and flexible substrate.

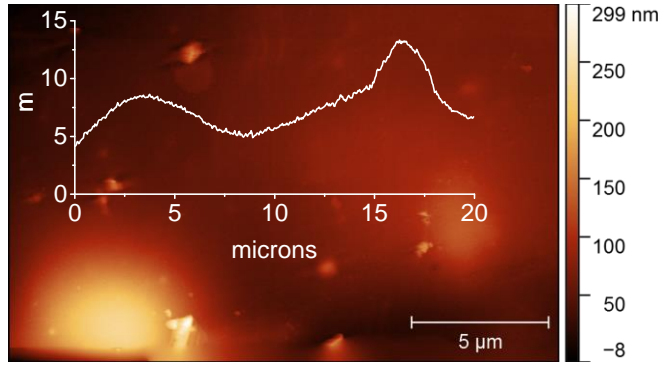

**Fig. S2. AFM image of PET.**

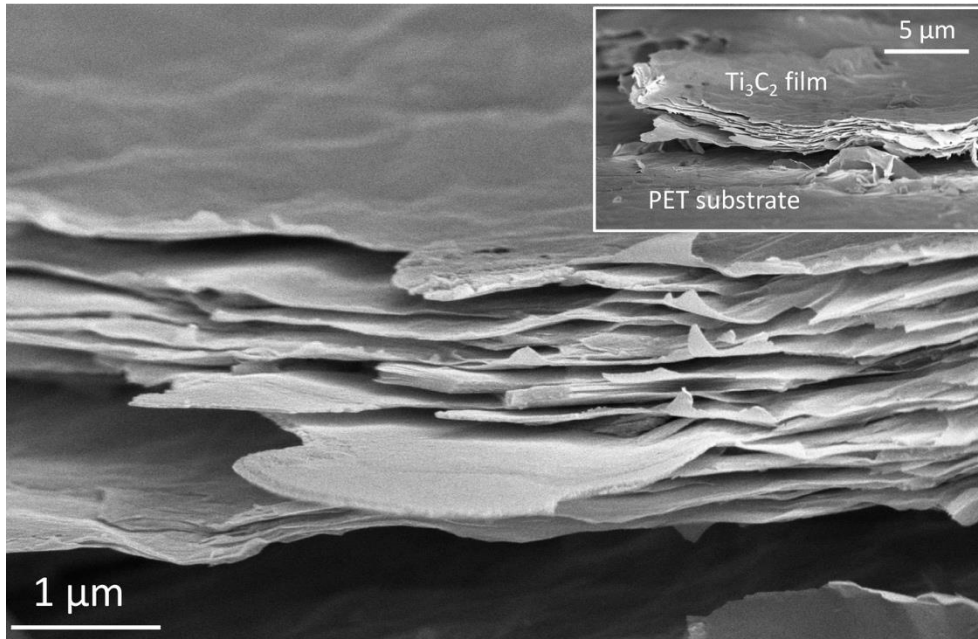

**Fig. S3. SEM image of a MXene  $\text{Ti}_3\text{C}_2$  antenna cross section.** We fractured a  $\text{Ti}_3\text{C}_2$  film antenna sprayed on PET to demonstrate its cross-section. The cross-section shows individual MXene flakes were restacked to form the film during spraying. The inset shows the same cross-section at lower magnification. The fractured cross-section is partially peeled off.

### Skin depth

In order to understand the meaning of the skin depth, one should understand how the current flows through the conductor. The alternating current (AC) applied to the conductor by a transmitter creates an oscillating electric and magnetic field in the conductor. This phenomenon leads to radiation of energy away from the conductor into space as a moving transverse electromagnetic field wave. On the other hand, during reception, the AC of an incoming radio wave resonates with the conductor, leading to the oscillation of the electrons which creates a current inside the conductor. This electric current passing through a conductor tends to be distributed near to the surface, as determined by the skin depth of the material. The equation is given below (2):

$$\delta = \sqrt{\frac{\rho}{\pi f \mu}}$$

where  $\delta$  is a skin depth,  $\rho$  is resistivity,  $f$  is frequency of the current,  $\mu$  is permeability of the material. At direct current (DC), electric current flows uniformly through a conductor. This means the current density is the same everywhere. In AC the current density actually drops off exponentially from the surface. It can be illustrated by the equation below (2):

$$J = J_0 e^{\left(\frac{-z}{\delta}\right)}$$

where  $J$  is a current density,  $\delta$  is a skin depth and  $z$  is a distance from the surface. While the thickness of the conductor decreases, the total current density decreases as well leading to the increase of the losses.

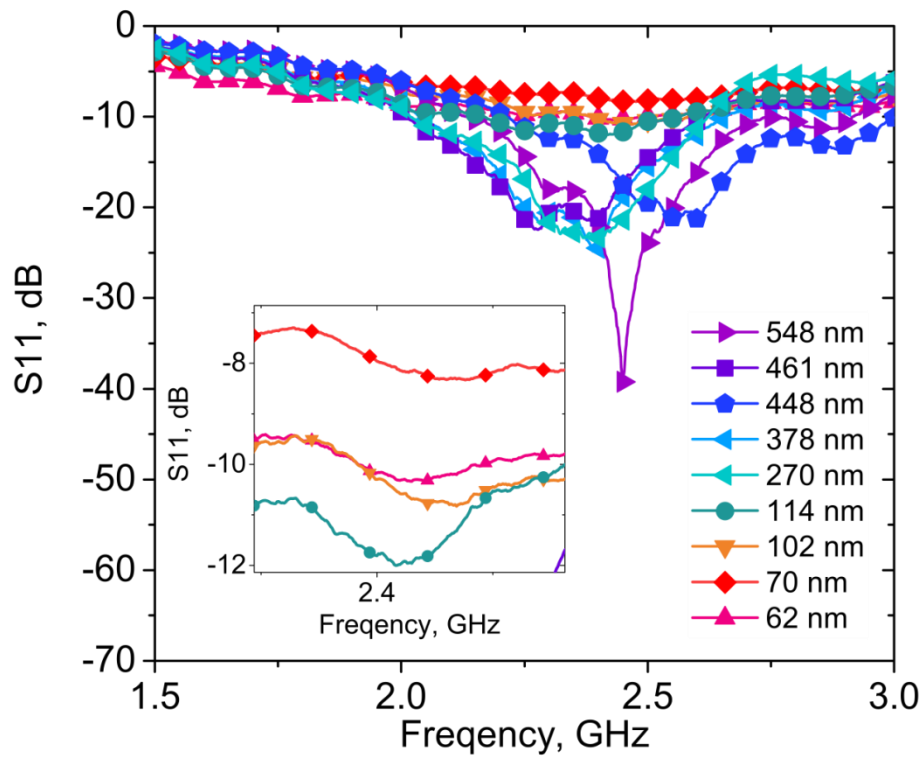

**Fig. S4. Reflection coefficient of  $\text{Ti}_3\text{C}_2$  MXene.** These reflection coefficients were measured on sprayed  $\text{Ti}_3\text{C}_2$  antennas with thicknesses between 62 to 548 nm.

**Table S2. Comparison of the return loss of MXene dipole antennas with other materials.** Metal ink, graphene, carbon nanotubes (CNT), onion like carbon (OLC), conductive polymers (PEDOT-PSS, PANI), transparent conductive oxides (ITO)

| Material                             | Antenna type     | thickness ( $\mu\text{m}$ ) | Return loss  (dB) | sheet resistance (Ohm/sq) | Reference |
|--------------------------------------|------------------|-----------------------------|-------------------|---------------------------|-----------|
| Ti <sub>3</sub> C <sub>2</sub> MXene | Dipole antenna   | 8                           | 65                | 0.02 $\pm$ 0.003          | This work |
|                                      | Dipole antenna   | 1.4                         | 36                | 0.77 $\pm$ 0.08           |           |
|                                      | Dipole antenna   | 0.548                       | 39                | 2.26 $\pm$ 0.28           |           |
|                                      | Dipole antenna   | 0.461                       | 22                | 3.85 $\pm$ 0.31           |           |
|                                      | Dipole antenna   | 0.448                       | 21                | 4.13 $\pm$ 0.15           |           |
|                                      | Dipole antenna   | 0.378                       | 24                | 5.27 $\pm$ 0.26           |           |
|                                      | Dipole antenna   | 0.270                       | 23                | 8.5 $\pm$ 0.8             |           |
|                                      | Dipole antenna   | 0.114                       | 12                | 18.4 $\pm$ 1.7            |           |
|                                      | Dipole antenna   | 0.102                       | 11                | 25.6 $\pm$ 2.2            |           |
|                                      | Dipole antenna   | 0.070                       | 8                 | 43 $\pm$ 10               |           |
|                                      | Dipole antenna   | 0.062                       | 10                | 47 $\pm$ 8                |           |
| Cu foil                              | Dipole antenna   | 50                          | 42                | 0.00021                   |           |
| Cu foil                              | Dipole antenna   | 10                          | 23                | 0.001344                  |           |
| Cu foil                              | Dipole antenna   | 6.5                         | 31                | 0.0024                    |           |
| Al foil                              | Dipole antenna   | 80                          | 33                | 0.00141                   |           |
| Al foil                              | Dipole antenna   | 12                          | 24                | 0.00282                   |           |
| Al foil                              | Dipole antenna   | 7                           | 10                | 0.0043                    |           |
| Silver ink                           | Dipole antenna   | 4                           | 50                | 0.017                     | 34        |
| Silver nanopaste                     | Dipole antenna   | 12                          | 47                | 0.003                     | 35        |
| Copper                               | Dipole antenna   | 31                          | 28                |                           | 35        |
| PEDOT-PSS                            | Dipole antenna   | 25                          | 15                | 1200                      | 4         |
| Silver ink                           | Dipole antenna   | 1.5                         | 19                | 3.6                       | 36        |
| Silver ink                           | Dipole antenna   | 3                           | 27                | 3.1                       | 36        |
| Silver ink                           | Dipole antenna   | 7.5                         | 21                | 16                        | 36        |
| Au/CNT on textiles                   | Patch antenna    |                             | 22                | 2                         | 37        |
| MWCNT-PDMS-Au                        | Patch antenna    | 1                           | 20                | 10                        | 38        |
| MWCNT                                | Dipole antenna   | 25                          | 30                | 5.9                       | 8         |
| MWCNT ink                            | Patch antenna    | 500                         | 28.5              | 110                       | 39        |
| ITO                                  | Monopole antenna |                             | 23                | 10                        | 40        |
| CNP@Pt PANI                          | Dipole antenna   | 50                          | 37.4              | 3                         | 41        |
| C/PANI                               | Monopole antenna | 50                          | 18.5              | 2.5                       | 42        |
| CNT                                  | Dipole antenna   | 250                         | 10                | 0.2                       | 6         |
| OLC                                  | Dipole antenna   | 250                         | 10                | 0.04                      | 6         |
| Graphene                             | Patch antenna    | 25                          | 17                | 4.8                       | 43        |
| Silver ink                           | Dipole antenna   | 50                          | 29                | 0.041                     | 44        |
| Graphene                             | Dipole antenna   | 25                          | 15                | 4                         | 44        |
| Graphene                             | Dipole antenna   | 7.7                         | 12                | 8.2                       | 12        |

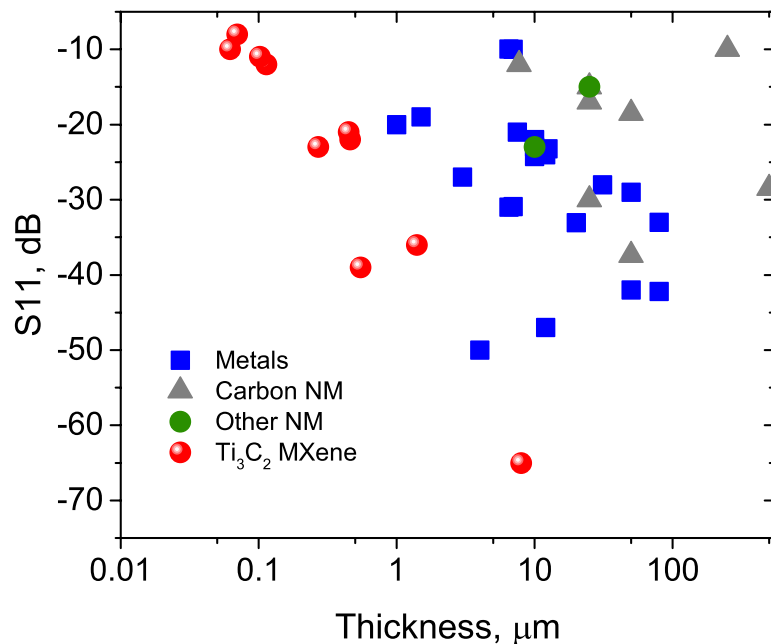

**Fig. S5. Comparison of the return loss of MXene dipole antenna with metals, carbon nanomaterials, conductive polymers, and transparent conductive oxides.** Data are taken from the table S2.  $\text{Ti}_3\text{C}_2$  MXene results are presented as red circles.

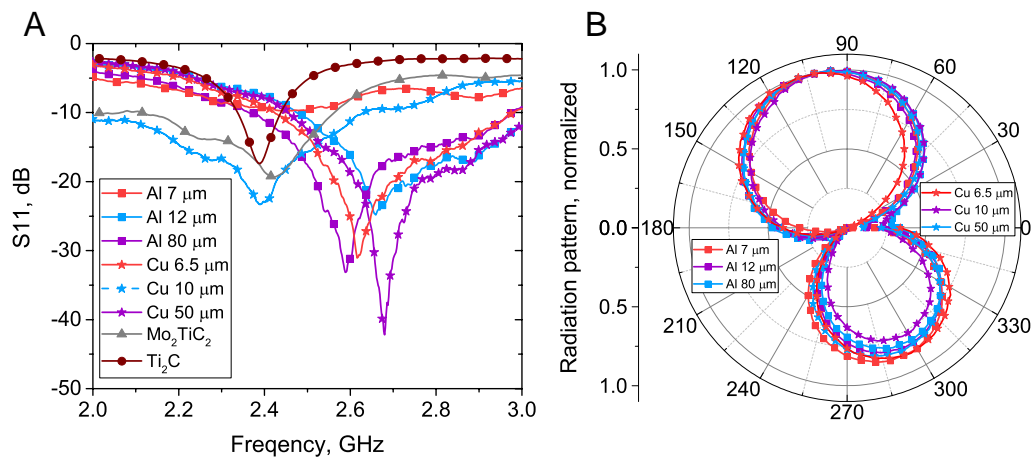

**Fig. S6. Characteristics of dipole antennas made of  $\text{Mo}_2\text{TiC}_2$ ,  $\text{Ti}_2\text{C}$  MXenes, and metal foils.** (A) Reflection coefficient of antennas made of aluminum, copper foil and different MXenes compositions ( $\text{Ti}_2\text{C}$  and  $\text{Mo}_2\text{TiC}_2$ ). (B) Normalized radiation pattern of metal foil antennas.

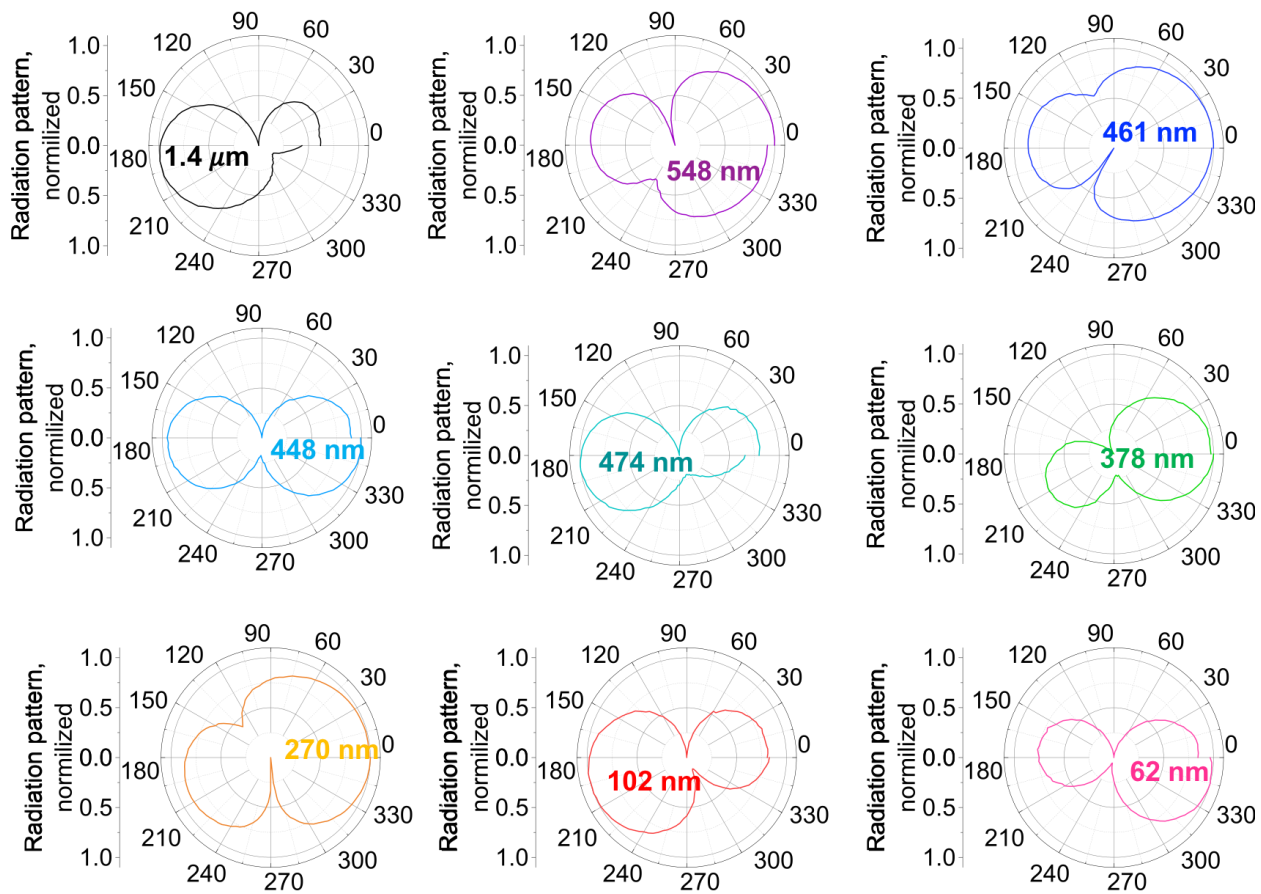

**Fig. S7. Normalized radiation pattern of Ti<sub>3</sub>C<sub>2</sub> MXene sprayed film antennas.** MXene film thickness in each antenna is shown on each plot.

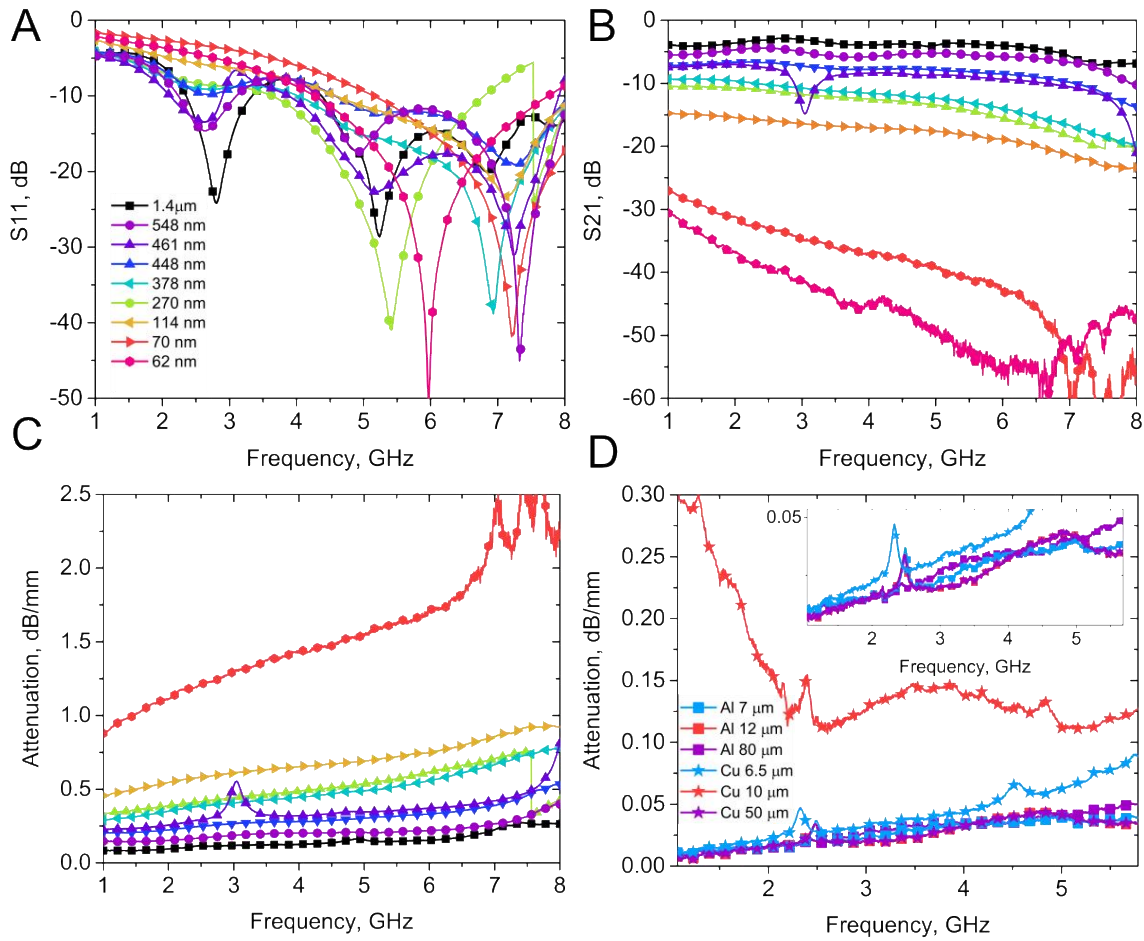

**Fig. S8. Characteristics of transmission lines made of MXene  $\text{Ti}_3\text{C}_2$  and metal foils.**  $S_{11}$  (reflection, **A**),  $S_{21}$  (transmission, **B**) and attenuation (**C**) of sprayed thin-film MXene antennas in the region from 1 to 8 GHz. Attenuation (**D**) of transmission lines made of metal (aluminum and copper) foils.

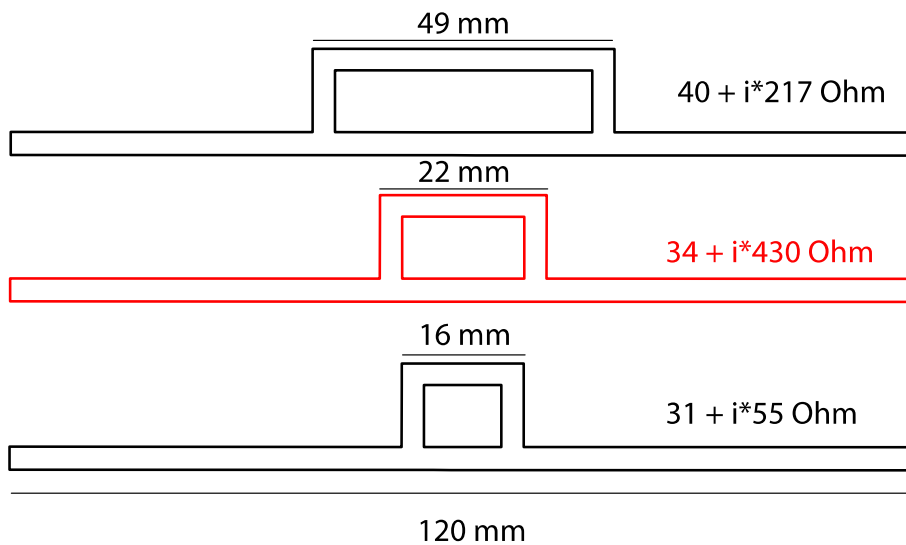

**Fig. S9. Dimensions of RFID antennas made of  $\text{Ti}_3\text{C}_2$  MXene.** Red is attributed to the design with the closest impedance matching and therefore the longest reading range (8 meters).
